# Supplementary material for: Reduced bone length, growth plate thickness, bone content, and IGF-I as a model for poor growth in the CFTR-deficient rat
Source: PubMed Central journal article supplement (PMC5708703; doi:10.1371/journal.pone.0188497), 2017-11-30
Supplement: pone.0188497.s001.pdf [file pone.0188497.s001.pdf]

## Supplemental Figure

### IGF-I Concentrations Compared to Age and Weight of CF and WT Rats

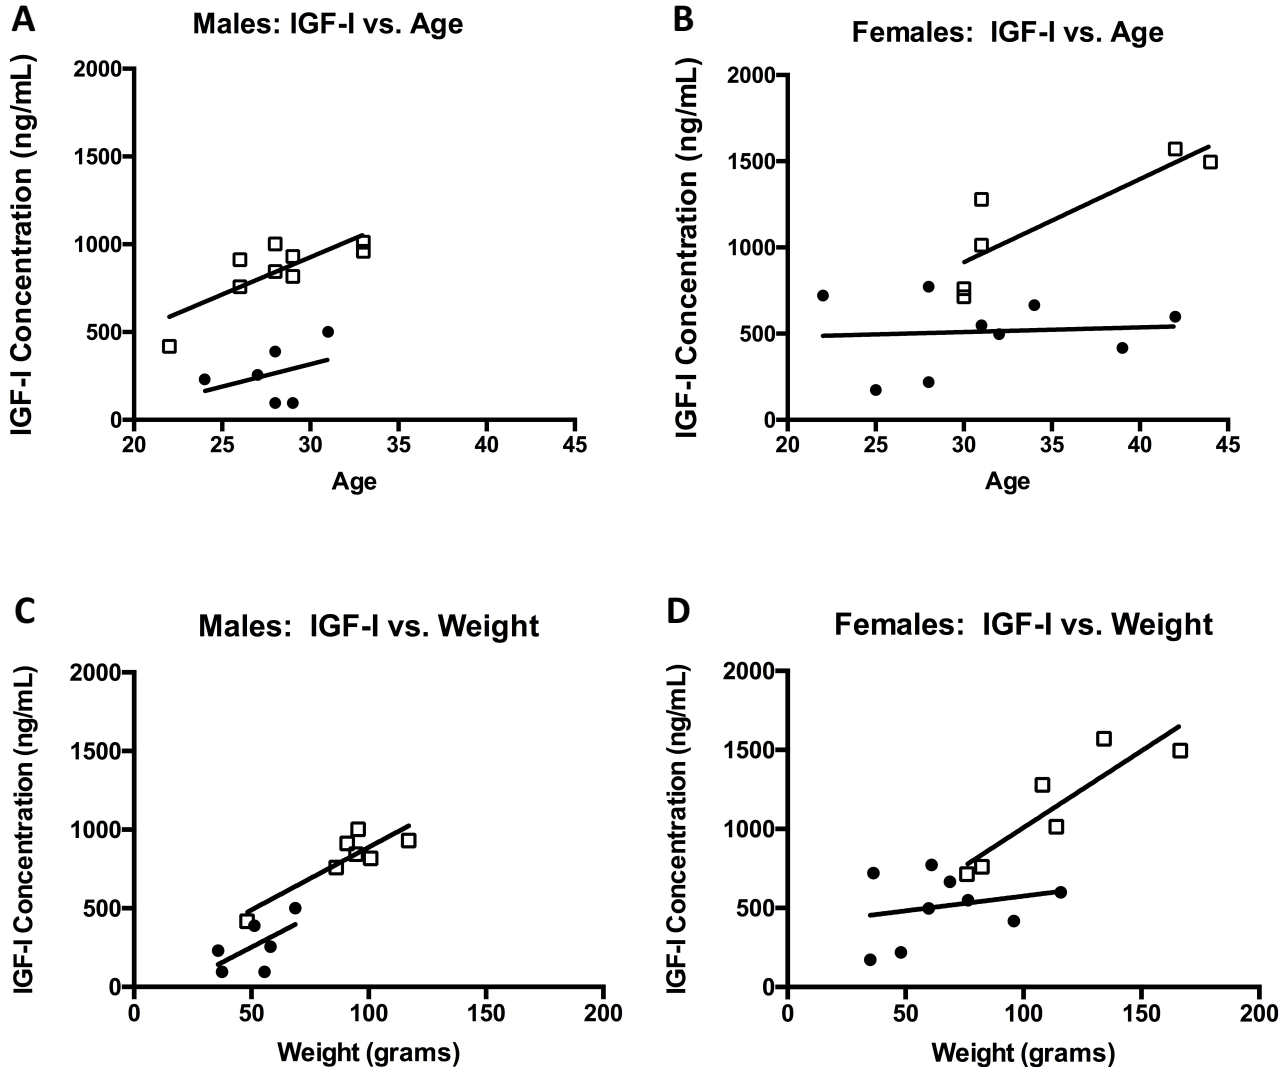

IGF-I concentrations in both male and female WT rats (□) correlated with age (A and B,  $p=0.009$  and  $0.03$  respectively) and weight (C and D,  $p=0.0095$  and  $0.018$ ), but this association was not observed for *Cftr*<sup>-/-</sup> rats (●).
